# Supplementary material for: Active learning of polarizable nanoparticle phase diagrams for the guided design of triggerable self-assembling superlattices
Source: Royal Society of Chemistry journal article supplement (doi:10.1039/d1me00187f), 2022-01-01
Supplement: d1me00187f1.pdf [file d1me00187f1.pdf]

**Supporting information for:**

**Active learning of polarizable nanoparticle phase  
diagrams for the guided design of triggerable  
self-assembling superlattices**

Siva Dasetty,<sup>†</sup> Igor Coropceanu,<sup>‡</sup> Joshua Portner,<sup>‡</sup> Jiyuan Li,<sup>†</sup> Juan J. de  
Pablo,<sup>†</sup> Dmitri Talapin,<sup>†,‡,¶</sup> and Andrew L. Ferguson<sup>\*,†</sup>

<sup>†</sup>*Pritzker School of Molecular Engineering, University of Chicago, Chicago, Illinois 60637*

<sup>‡</sup>*Department of Chemistry, University of Chicago, Chicago, Illinois 60637*

<sup>¶</sup>*James Franck Institute, University of Chicago, Chicago, Illinois 60637*

E-mail: [andrewferguson@uchicago.edu](mailto:andrewferguson@uchicago.edu)

# 1 Trends in the assembly of 20-particle system compared with experiments

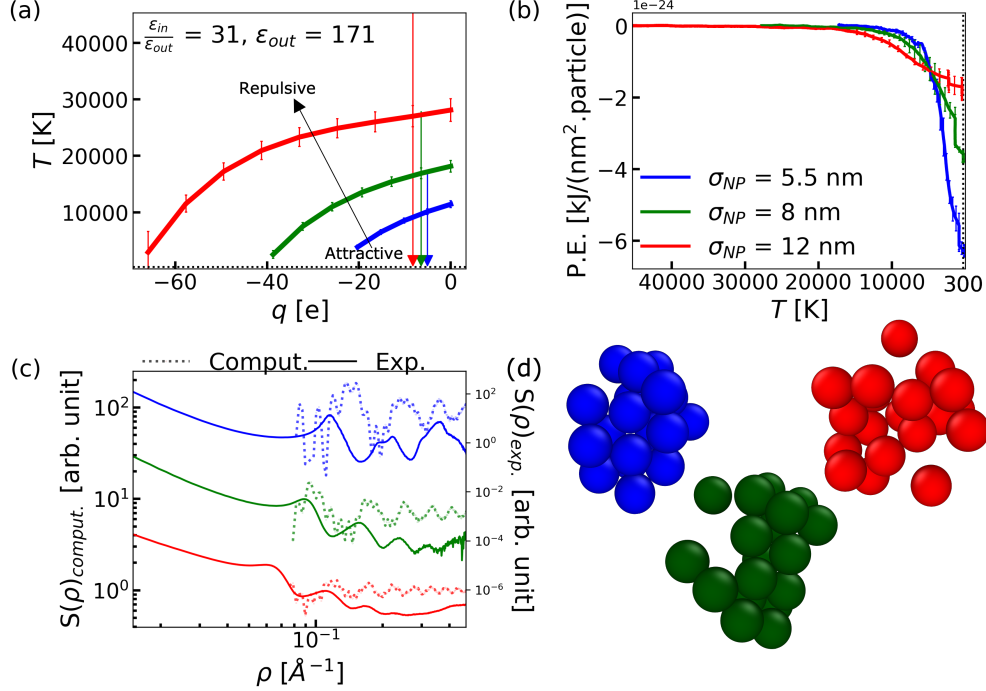

Figure S1: Computational and experimental comparison of the self-assembly of  $\text{K}_4\text{Sn}_2\text{S}_6$  functionalized gold nanoparticles in NMF. (a) Calculated phase diagram for 2-particle assembly projected into the  $T$ - $q$  plane for NPs of diameter  $\sigma_{NP}$  5.5 nm (blue), 8 nm (green), and 12 nm (red). The lines correspond to the locus of points for which  $\Delta A^* = 0$  separating the attractive and repulsive regimes are below and above each curve, respectively. Error bars on each phase boundary represent the standard deviation in  $\Delta A^*$  estimated by the terminal fitted GPR model. The vertical arrows indicate the simulated annealing temperature quenches used to determine the stable self-assembled structures of our 20-particle systems from an initial high temperature down to the 300 K target temperature indicated by the horizontal dashed line. The location of each vertical arrow on the x-axis corresponds to the  $q$  value assigned to each NP in our simulations. (b) Potential energies (P.E.) ( $U_{NP-NP}$  in Eq. 1 (main text) normalized by particle surface area  $4\pi(\sigma_{NP}/2)^2$  and number of particles) observed during the terminal temperature quench of the 20-particle simulated annealing calculations. (c) Comparison of computational (dotted) and experimental (solid) structure factors  $S(\rho)$  for the terminal self-assembled aggregates. For clarity of viewing, the 5.5 nm (blue) experimental data are vertically shifted in log-scale by  $(-18.42)$  arb. unit and the 8 nm (green) data by  $(-6.50)$  arb. unit. The computational data are then aligned with the experimental results. To avoid confusion with our symbol for charge, we denote the scattering vector by  $\rho$ . (d) Snapshots of the self-assembled structures produced at the end of the simulated annealing calculations.

## 2 Computational design of temperature triggerable superlattices of particles with $\frac{\epsilon_{in}}{\epsilon_{out}}$ of 0.5

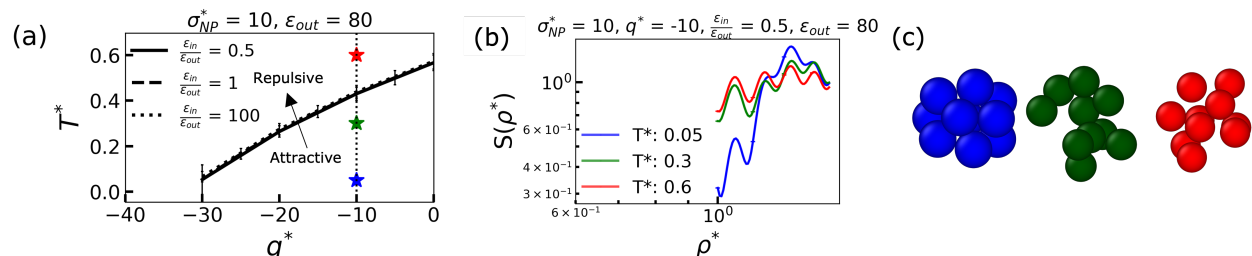

Figure S2: Computational design of temperature-triggerable assembly/disassembly in self-assembled NP superlattices. (a) Calculated phase diagram for 2-particle assembly projected into the  $T^*$ - $q^*$  plane for NPs of diameter  $\sigma_{NP}^* = 10$  in a solvent with a dielectric constant of  $\epsilon_{out} = 80$  and different dielectric contrasts  $\frac{\epsilon_{in}}{\epsilon_{out}} = 0.5, 1, \text{ and } 100$ . The lines correspond to the locus of points for which  $\Delta A^* = 0$  separating the attractive and repulsive regimes below and above each curve, respectively. Different line styles correspond to different  $\frac{\epsilon_{in}}{\epsilon_{out}}$ . Error bars on each phase boundary represent the standard deviation in  $\Delta A^*$  estimated by the terminal fitted GPR model. The location of the vertical dotted line on the x-axis corresponds to the  $q$  value assigned to the NP in our simulations. The stars on the vertical dotted line represent the temperature at which structure analysis was performed – 0.05 (blue), 0.3 (green), and 0.6 (red). (b) Computed structure factors  $S(\rho)$  for the terminal self-assembled aggregates at each temperature highlighted in (a) spanning across the phase boundary for  $\frac{\epsilon_{in}}{\epsilon_{out}} = 0.5$ . (c) Snapshots of the self-assembled structures corresponding to computed structure factors shown in (b) at each temperature.

### 3 Computational design of temperature triggerable superlattices of particles with $\frac{\epsilon_{in}}{\epsilon_{out}}$ of 1.0

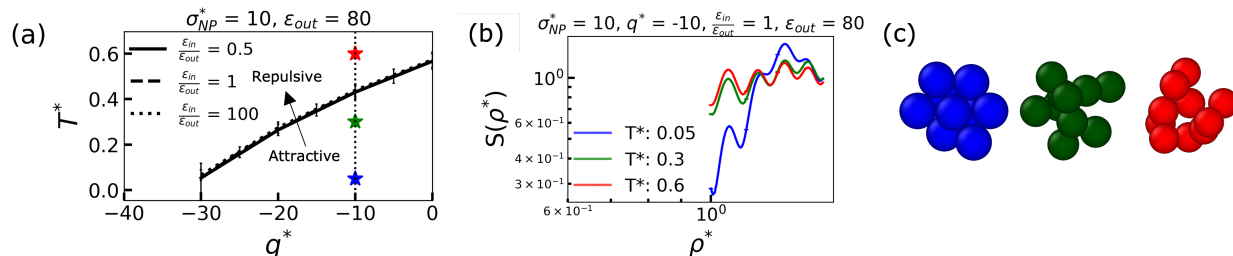

Figure S3: Computational design of temperature-triggerable assembly/disassembly in self-assembled NP superlattices. (a) Calculated phase diagram for 2-particle assembly projected into the  $T^*$ - $q^*$  plane for NPs of diameter  $\sigma_{NP}^* = 10$  in a solvent with a dielectric constant  $\epsilon_{out} = 80$  and different dielectric contrasts  $\frac{\epsilon_{in}}{\epsilon_{out}} = 0.5, 1, \text{ and } 100$ . The lines correspond to the locus of points for which  $\Delta A^* = 0$  separating the attractive and repulsive regimes are below and above each curve, respectively. Different line styles correspond to different  $\frac{\epsilon_{in}}{\epsilon_{out}}$ . Error bars on each phase boundary represent the standard deviation in  $\Delta A^*$  estimated by the terminal fitted GPR model. The location of the vertical dotted line on the x-axis corresponds to the  $q$  value assigned to the NP in our simulations. The stars on the vertical dotted line represent the temperature at which structure analysis was performed – 0.05 (blue), 0.3 (green), and 0.6 (red). (b) Computed structure factors  $S(\rho)$  for the terminal self-assembled aggregates at each temperature highlighted in (a) spanning across the phase boundary for  $\frac{\epsilon_{in}}{\epsilon_{out}} = 1.0$ . (c) Snapshots of the self-assembled structures corresponding to computed structure factors shown in (b) at each temperature.
